# Supplementary material for: Exploring some substituted chalcones as DprE1 inhibitors for antitubercular activity: An integrated computational approach
Source: Research Square preprint supplement (doi:10.21203/rs.3.rs-4259865/v1), 2024-04-22
Supplement: Supplementary file 1 [file b44e007df0f8ab58aa25913d.docx]

**Supplementary information**

S1 Fig. 1a Methylacetopheneone series

S1 Fig. 1b Methoxyacetophenone series

S1 Fig. 1c Chloroacetophenone series
